# Supplementary material for: Microfluidic Concatemer Sequencing Unveils Cooperative and Competitive Dynamics of Enhancer Clusters in Gene Regulation
Source: Research Square preprint supplement (doi:10.21203/rs.3.rs-7295477/v1), 2025-09-11
Supplement: Supplementary file 1 [file 2594418f76eeed572a8f7c05.xlsx]

## Sheet: TableS3 (MD simulation)
Number of beads in polymer	Number of polymers
58	4
88	4
117	3
147	5
175	2
205	2
235	4
263	3
322	1
351	3
382	3
411	1
440	2
499	2
528	2
587	2
646	1
676	1
704	2
735	1
794	1
852	2
881	2
909	1
941	1
999	1
1028	2
1235	1
1352	1
1586	1
2086	1
