# Supplementary material for: Microfluidic Concatemer Sequencing Unveils Cooperative and Competitive Dynamics of Enhancer Clusters in Gene Regulation
Source: Research Square preprint supplement (doi:10.21203/rs.3.rs-7295477/v1), 2025-09-11
Supplement: Supplementary file 2 [file 3493ab15fb7b1b54e2527bc8.xlsx]

## Sheet: Table S4(singleton statistics)
K562 d-LHCC
	Total num	Singleton	%Singleton
All contacts	13100082	6514739	49.7
cis contacts	7987223	1610523	20.1
trans contacts	5112859	4904216	95.9
GM12878 d-LHCC
	Total num	Singleton	%Singleton
All contacts	2765720	1462489	52.9
cis contacts	1624951	347216	21.4
trans contacts	1140769	1115273	97.8
GM12878 s-HCC
	Total num	Singleton	%Singleton
All contacts	6760335	5371939	79.5
cis contacts	3568694	2203769	61.8
trans contacts	3191641	3168170	99.3
