# Supplementary material for: Microfluidic Concatemer Sequencing Unveils Cooperative and Competitive Dynamics of Enhancer Clusters in Gene Regulation
Source: Research Square preprint supplement (doi:10.21203/rs.3.rs-7295477/v1), 2025-09-11
Supplement: Supplementary file 3 [file 6d94ed1378c0ce4982924b1b.xlsx]

## Sheet: TableS2(sequencing statistics)
cell line	experiments	total reads	total base
GM12878	Drop-t	940008772	260382429844
GM12878	Drop-t	988982663	273948197651
K562	Drop-t	2815774423	779969515171
K562	Drop-t	2933374389	812544705763
K562	Pore-C	6258984	11234468781
K562	Pore-C	6460112	9860937208
K562	scRNA-seq	364150663	65547119340
