# Supplementary material for: Microfluidic Concatemer Sequencing Unveils Cooperative and Competitive Dynamics of Enhancer Clusters in Gene Regulation
Source: Research Square preprint supplement (doi:10.21203/rs.3.rs-7295477/v1), 2025-09-11
Supplement: Supplementary file 4 [file 7b5acb7ed204b19a519194c3.xlsx]

## Sheet: TableS1 (public data summary)
cell line	experiments	accsion code or website	publication
GM12878	Pore-C	GSE149117	Deshpande et,al. Nature Biotechnology (2022)
GM12878	HiPoreC	GSE202539	Zhong et, al. Nature Communications (2023)
K562
K562	C-walks	GSE77553	Olivares-Chauvet et,al. Nature (2016)
GM12878	SPRITE	GSE114242	Quinodoz et,al. Cell (2018)
K562	Chromatin Tracing	https://github.com/BogdanBintu/ChromatinImaging	Bintu et,al. Science (2018)
K562	Hi-C	GSE63525	Rao et,al. Nature (2014)
GM12878
GM12878	SHARE-seq	GSE140203	Ma S et,al. Cell (2020)
K562
GM12878	H3K27ac ChIP-seq	https://www.encodeproject.org/files/ENCFF087YCU/	Pope BD et al. Nature (2014)
GM12878	4C	GSE82150	Wood et,al. Elife (2016)
HelaS3	Multi-contact 3C	GSE146945	Tavares-Cadete F et,al. Mol Biol (2020)
