# Supplementary figures and images for: Microfluidic Concatemer Sequencing Unveils Cooperative and Competitive Dynamics of Enhancer Clusters in Gene Regulation
Source: Research Square preprint supplement (doi:10.21203/rs.3.rs-7295477/v1), 2025-09-11

A

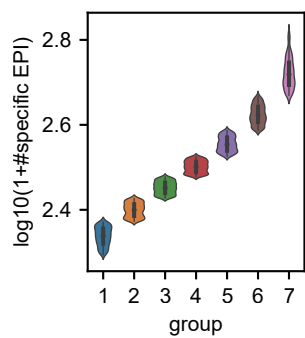

B

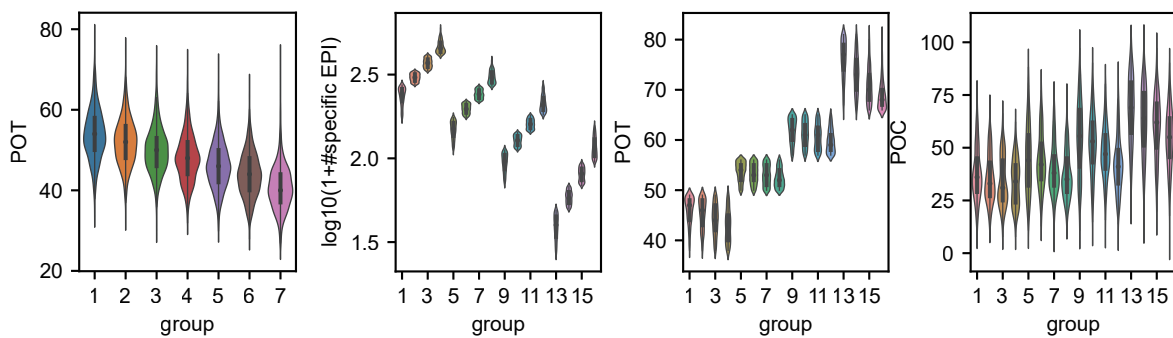

C

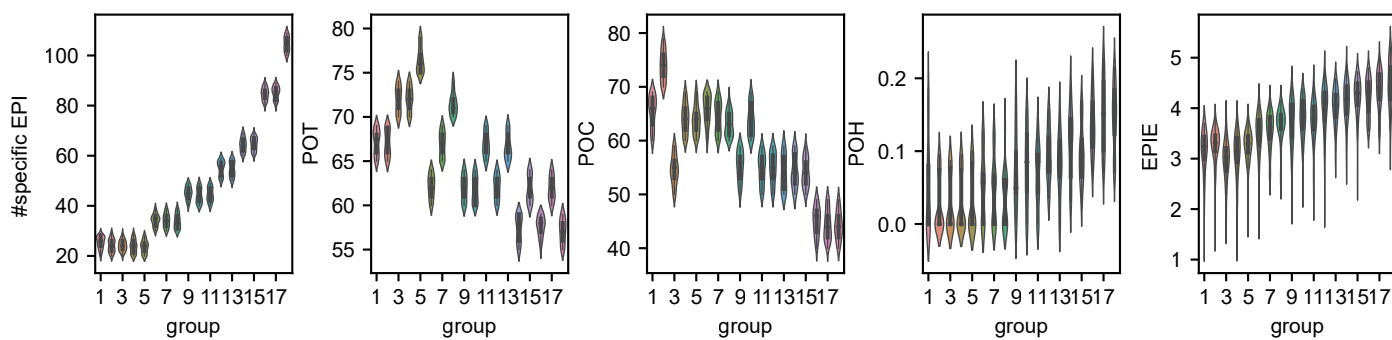

D

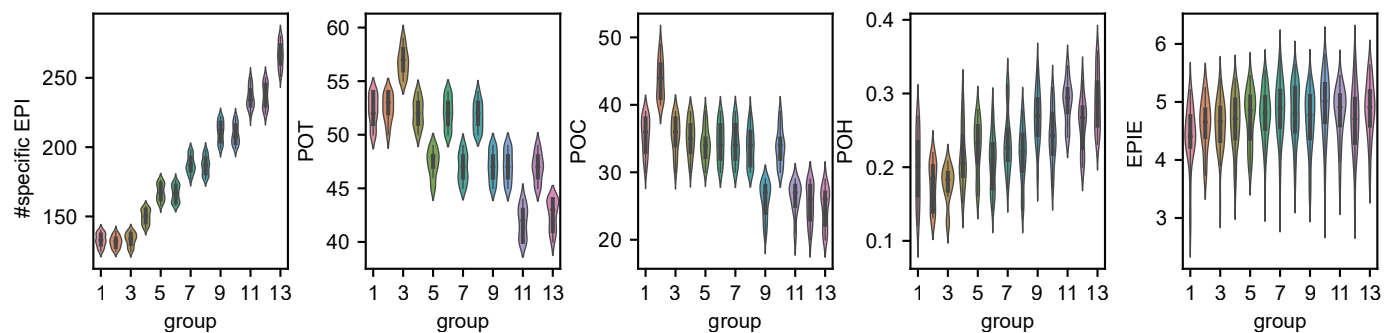

Supplement: Supplementary file 1 [file 1c5f8151aa6865cb35e24c59.pdf]

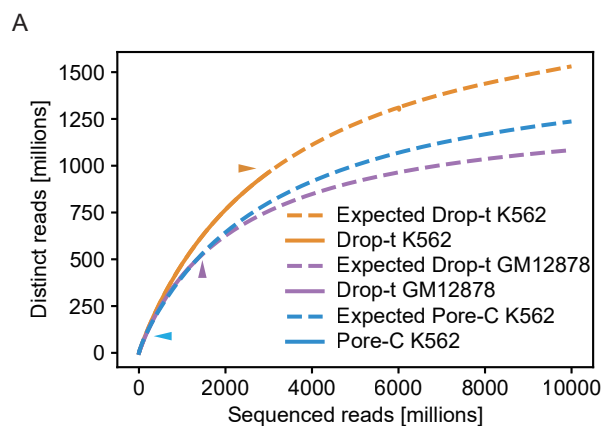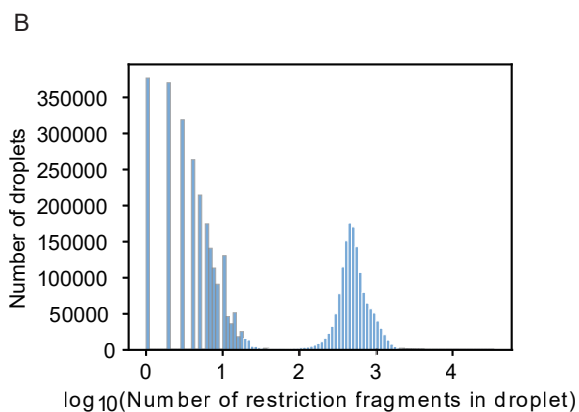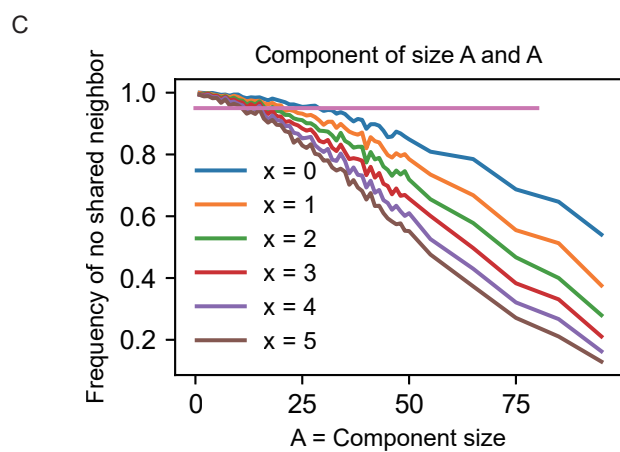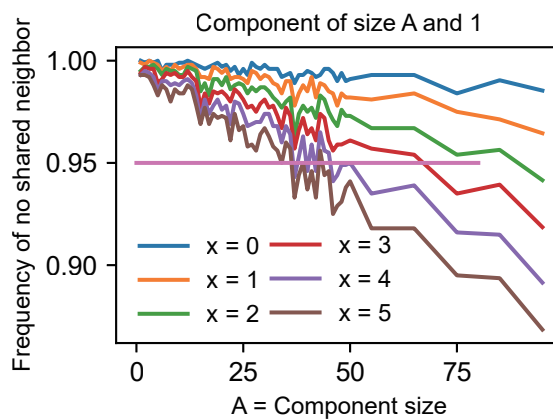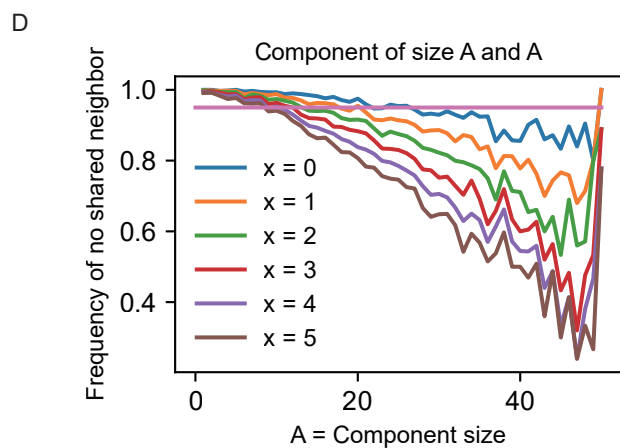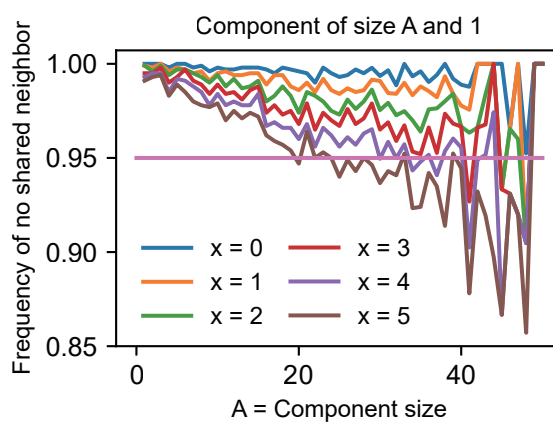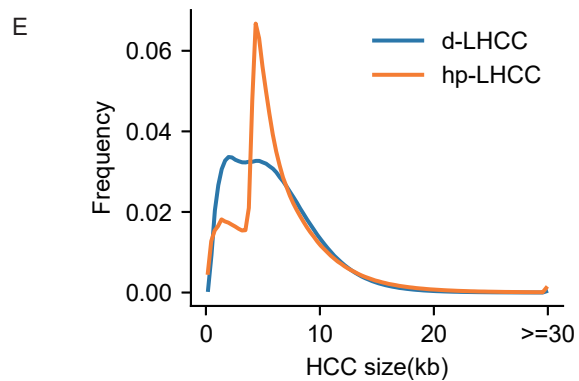

Supplement: Supplementary file 2 [file 3f76b9795f917df1dfd997f2.pdf]
